# Supplementary material for: Raman-encoded microbeads for spectral multiplexing with SERS detection
Source: Royal Society of Chemistry journal article supplement (doi:10.1039/c4ra16163g), 2015-01-01
Supplement: c4ra16163g1.pdf [file c4ra16163g1.pdf]

## Electronic Supplementary Information (ESI)

# Raman-Encoded Microbeads for Spectral Multiplexing with SERS Detection

Yuming Lai,<sup>a, b, d</sup> Shuqing Sun,<sup>c</sup> Tao He,<sup>d</sup> Sebastian Schlücker<sup>a</sup> and Yuling Wang<sup>\*a</sup>

<sup>a</sup> Faculty of Chemistry, University of Duisburg-Essen, D-45141, Germany, Email: [yuling.wang@uni-due.de](mailto:yuling.wang@uni-due.de)

<sup>b</sup> National Center for Materials Service Safety, University of Science and Technology Beijing, Beijing 100083, China

<sup>c</sup> Laboratory of Optical Imaging and Imaging, Shenzhen Key Laboratory for Minimally Invasive Medical Technologies, Graduate School at Shenzhen, Tsinghua University, Shenzhen, 518055, China

<sup>d</sup> Laboratory of Nanodevice, National Center for Nanoscience and Technology, Beijing, 100190, China

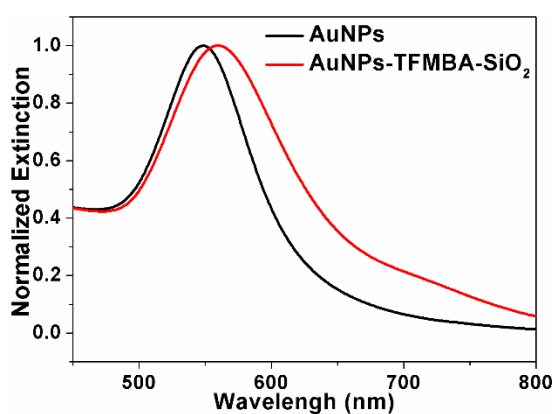

**Figure S1.** Normalized extinction spectra of AuNPs and AuNPs-TFMBA@SiO<sub>2</sub>.
